# Supplementary material for: Glatiramer Acetate Treatment in Multiple Sclerosis-Associated Fatigue—Beneficial Effects on Self-Assessment Scales But Not on Molecular Markers
Source: MDPI journal article supplement (doi:10.3390/biom11030393), 2021-03-07
Supplement: s1 [file s1]

## Supplementary Material. Fatigue self-assessment scales

### **Fatigue Severity Scale (FSS) [16]**

Nine items. The score ranges from 1 = not true to 7 = absolutely true. The overall score is given as the mean of the nine items (range 1 to 7). The higher the score is, the more severe is the fatigue.

1. My motivation is lower when I am fatigued.
2. Exercise brings on my fatigue.
3. I am easily fatigued.
4. Fatigue interferes with my physical functioning.
5. Fatigue causes frequent problems to me.
6. My fatigue prevents sustained physical functioning.
7. Fatigue interferes with carrying out certain duties and responsibilities.
8. Fatigue is among my three most disabling symptoms.
9. Fatigue interferes with my work, my family, or social life.

### **MS-Fatigue Severity Scale (MS-FSS) [17]**

Six items. The score ranges from 1 = not true to 7 = absolutely true. The overall score is given as the mean of the six items (range 1 to 7). The higher the score is, the more severe is the fatigue.

1. Heat worsens my fatigue.
2. Long periods of inactivity worsen the fatigue.
3. Stress worsens the fatigue.
4. Depressive mood worsens the fatigue.
5. Cool temperatures improve my fatigue.
6. Positive experiences improve my fatigue.

### **Modified Fatigue Impact Scale (MFIS) [18]**

Twenty-one items assessing physical, cognitive, social and total fatigue. The overall score is given as the sum of the responses to 21 single questions (0 = never; 1 = rarely; 2 = sometimes; 3 = frequently; 4 = always; range 0 to 84). The higher the score is, the higher is the impact of fatigue on daily activities.

The overall MFIS score can be divided into the three subscores physical (nine questions), cognitive (ten questions) and social (two questions).

During the last four weeks, because of my fatigue...

1. ... I was less alert
2. ... I had difficulties pursuing things for longer time
3. ... I was not able to think clearly
4. ... I was inapt and uncoordinated
5. ... I was forgetful
6. ... I had to limitate my physical activity
7. ... I was barely motivated to do things associated with physical effort
8. ... I was barely motivated to take part in social activities
9. ... I was limited to do things outside my home
10. ... I had difficulties to maintain efforts over longer time periods
11. ... I had difficulties to make decisions
12. ... I was barely motivated to do things I had to concentrate on
13. ... I felt weak
14. ... I did not feel well physically
15. ... I had difficulties to finish things I had to concentrate on
16. ... I had difficulties to hold my thoughts together at home or at work
17. ... I was not able to finish things requiring physical effort
18. ... my thinking was slowed
19. ... I had difficulties to concentrate
20. ... I limited my physical activities
21. ... I needed more or longer breaks

## Supplementary Material. Inclusion and exclusion criteria of our study

### **Inclusion criteria**

- Patients with relapsing-remitting multiple sclerosis (MS); therapy with glatiramer acetate (GA) is indicated according to treatment guidelines
- Presence of fatigue as one of the most frequent and disabling symptoms. The following three questions had to be answered with “yes” [31]:
  1. Is fatigue one of your three most disabling symptoms?
  2. Does fatigue occur daily or at most days?
  3. Does fatigue affect your activities at home or at work?
- Signed consent form

### **Exclusion criteria**

- Previous treatment with GA
- Treatment with other immunomodulatory agents within two months before baseline
- Treatment with other immunosuppressive agents within six months before baseline
- MS relapse within six weeks before baseline
- Treatment with steroids within four weeks before baseline
- Pregnancy or breast feeding within six months before baseline
- Major depression (Beck Depression Inventory [BDI] > 18) [33]
- Untreated hypothyroidism
- Symptomatic treatment of MS with sedating agents whose dose can increase MS fatigue (such as baclofen or carbamazepine)

**Table S1.** Transcripts analyzed using real-time PCR microarrays (in alphabetical order)

| No | Abbreviation | Transcript                                                                       |
|----|--------------|----------------------------------------------------------------------------------|
| 1  | ARTN         | Artemin (neurotrophic factor)                                                    |
| 2  | BDNF         | Brain derived neurotrophic factor                                                |
| 3  | BLR-1        | Blue-light regulator 1 (transcription factor)                                    |
| 4  | BSG          | Basigin = CD147                                                                  |
| 5  | CBLN1        | Cerebellin-1                                                                     |
| 6  | CCL1         | Chemokine CCL1                                                                   |
| 7  | CCL5         | Chemokine CCL5                                                                   |
| 8  | CCL7         | Chemokine CCL7                                                                   |
| 9  | CCL11        | Chemokine CCL11                                                                  |
| 10 | CCL17        | Chemokine CCL17                                                                  |
| 11 | CCL21        | Chemokine CCL21                                                                  |
| 12 | CCR1         | Chemokine receptor CCR1                                                          |
| 13 | CCR2         | Chemokine receptor CCR2                                                          |
| 14 | CCR3         | Chemokine receptor CCR3                                                          |
| 15 | CCR4         | Chemokine receptor CCR4                                                          |
| 16 | CCR5         | Chemokine receptor CCR5                                                          |
| 17 | CCR6         | Chemokine receptor CCR6                                                          |
| 18 | CCR7         | Chemokine receptor CCR7                                                          |
| 19 | CCR8         | Chemokine receptor CCR8                                                          |
| 20 | CCR9         | Chemokine receptor CCR9                                                          |
| 21 | CCR10        | Chemokine receptor CCR10                                                         |
| 22 | CD4          | CD4                                                                              |
| 23 | CD7          | CD7                                                                              |
| 24 | CD8A         | CD8A                                                                             |
| 25 | CD14         | CD14                                                                             |
| 26 | CD19         | CD19                                                                             |
| 27 | CD22         | CD22                                                                             |
| 28 | CD28         | CD28                                                                             |
| 29 | CD38         | CD38                                                                             |
| 30 | CD40         | CD40                                                                             |
| 31 | CD44         | CD44                                                                             |
| 32 | CD79B        | CD79B                                                                            |
| 33 | CD86         | CD86                                                                             |
| 34 | CD247        | CD247                                                                            |
| 35 | CEBPB        | Cebpb (transcription factor)                                                     |
| 36 | CNTF; ZFP91  | Ciliary neurotrophic factor                                                      |
| 37 | CNTRF1       | Ciliary neurotrophic factor receptor 1                                           |
| 38 | CRHBP        | Corticotropin releasing hormone binding protein                                  |
| 39 | CRHR1        | Corticotropin releasing hormone receptor 1                                       |
| 40 | CRHR2        | Corticotropin releasing hormone receptor 2                                       |
| 41 | CSF2         | Colony stimulating factor 2 (= granulocyte macrophage colony stimulating factor) |
| 42 | CTLA4        | Cytotoxic T-lymphocyte associated protein 4                                      |
| 43 | CXCR3        | Chemokine receptor CXCR3                                                         |
| 44 | CXCR4        | Chemokine receptor CXCR4                                                         |
| 45 | CXCL3        | Chemokine CXCL3                                                                  |
| 46 | CXCL5        | Chemokine CXCL5                                                                  |
| 47 | CXCL9        | Chemokine CXCL9                                                                  |
| 48 | CXCL10       | Chemokine CXCL10                                                                 |
| 49 | CXCL11       | Chemokine CXCL11                                                                 |
| 50 | CXCL12       | Chemokine CXCL12                                                                 |
| 51 | CXCL13       | Chemokine CXCL13                                                                 |
| 52 | CX3CR1       | Chemokine receptor CX3CR1                                                        |
| 53 | FAS          | Fas = CD95                                                                       |
| 54 | FASLG        | Fas ligand                                                                       |
| 55 | FCGR1A       | Fc gamma receptor 1A                                                             |
| 56 | FCGR2A       | Fc gamma receptor 2A                                                             |
| 57 | FCGR3A       | Fc gamma receptor 3A                                                             |
| 58 | FGF2         | Fibroblast growth factor 2                                                       |

|     |               |                                                                              |
|-----|---------------|------------------------------------------------------------------------------|
| 59  | FGF9          | Fibroblast growth factor 9                                                   |
| 60  | FGFR1         | Fibroblast growth factor receptor 1                                          |
| 61  | FOXP3         | Forkhead box P3                                                              |
| 62  | FRS2          | Fibroblast growth factor receptor substrate 2                                |
| 63  | FRS3          | Fibroblast growth factor receptor substrate 3                                |
| 64  | FUS           | FUS (Fused in sarcoma)                                                       |
| 65  | GATA3         | GATA binding protein 3                                                       |
| 66  | GDNF          | Glial cell line-derived neurotrophic factor                                  |
| 67  | GFRA1         | GDNF family receptor alpha 1                                                 |
| 68  | GFRA2         | GDNF family receptor alpha 2                                                 |
| 69  | GFRA3         | GDNF family receptor alpha 3                                                 |
| 70  | GF11          | GF11 (transcription regulator)                                               |
| 71  | GMFB          | Glia maturation factor beta                                                  |
| 72  | GMFG          | Glia maturation factor gamma                                                 |
| 73  | GPR44         | G protein-coupled receptor 44                                                |
| 74  | GZMA          | Granzyme alpha                                                               |
| 75  | GZMB          | Granzyme beta                                                                |
| 76  | HAVCR2        | Hepatitis A virus cellular receptor 2                                        |
| 77  | HLA-A         | Human leukocyte antigen A                                                    |
| 78  | ICAM1         | Intercellular adhesion molecule 1                                            |
| 79  | ICOS          | Inducible T-cell costimulator                                                |
| 80  | IFNG          | Interferon gamma                                                             |
| 81  | IFNGR1        | Interferon gamma receptor 1                                                  |
| 82  | IGF1          | Insulin-like growth factor 1                                                 |
| 83  | IGSF6         | Ig superfamily 6                                                             |
| 84  | IGHA1         | Immunoglobulin heavy constant alpha 1                                        |
| 85  | IGHD          | Immunoglobulin heavy constant delta                                          |
| 86  | IGHG1         | Immunoglobulin heavy constant gamma 1                                        |
| 87  | IGHM          | Immunoglobulin heavy constant mu                                             |
| 88  | IGKC; IGKV1-5 | Immunoglobulin kappa constant chain; immunoglobulin kappa variant chains 1-5 |
| 89  | IGL@; CKAP2   | Immunoglobulin light chain                                                   |
| 90  | IL1B          | Interleukin 1B                                                               |
| 91  | IL1R1         | Interleukin 1 receptor 1                                                     |
| 92  | IL1R2         | Interleukin 1 receptor 2                                                     |
| 93  | IL2           | Interleukin 2                                                                |
| 94  | IL2RA         | Interleukin 2 receptor A                                                     |
| 95  | IL2RB         | Interleukin 2 receptor B                                                     |
| 96  | IL4           | Interleukin 4                                                                |
| 97  | IL4R          | Interleukin 4 receptor                                                       |
| 98  | IL5           | Interleukin 5                                                                |
| 99  | IL6           | Interleukin 6                                                                |
| 100 | IL7           | Interleukin 7                                                                |
| 101 | IL7R          | Interleukin 7 receptor                                                       |
| 102 | IL8RA         | Interleukin 8 receptor A                                                     |
| 103 | IL8RB         | Interleukin 8 receptor B                                                     |
| 104 | IL9           | Interleukin 9                                                                |
| 105 | IL10          | Interleukin 10                                                               |
| 106 | IL12A         | Interleukin 12A                                                              |
| 107 | IL12B         | Interleukin 12B                                                              |
| 108 | IL12RB2       | Interleukin 12 receptor B2                                                   |
| 109 | IL13          | Interleukin 13                                                               |
| 110 | IL13RA1       | Interleukin 13 receptor A1                                                   |
| 111 | IL15          | Interleukin 15                                                               |
| 112 | IL17A         | Interleukin 17A                                                              |
| 113 | IL18          | Interleukin 18                                                               |
| 114 | IL18R1        | Interleukin 18 receptor 1                                                    |
| 115 | IL23A         | Interleukin 23A                                                              |
| 116 | IRF1          | Interferon regulatory factor 1                                               |
| 117 | IRF4          | Interferon regulatory factor 4                                               |
| 118 | ITGB2         | Integrin beta 2                                                              |
| 119 | JAK1          | Janus kinase 1                                                               |
| 120 | KCNA3         | Voltage-gated potassium channel Kv1.3                                        |

|     |          |                                                                                |
|-----|----------|--------------------------------------------------------------------------------|
| 121 | KCNN4    | Voltage-gated potassium channel Kca3.1                                         |
| 122 | LAG3     | Lymphocyte activation gene 3                                                   |
| 123 | LIF      | Leukemia inhibitory factor                                                     |
| 124 | LTA      | Leukotriene alpha                                                              |
| 125 | MAF      | Musculoaponeurotic fibrosarcoma (transcription factor)                         |
| 126 | MAGED1   | Melanoma associated antigen D1                                                 |
| 127 | MCTS1    | Monocyaboxylate transporters 1                                                 |
| 128 | MEF2C    | Myocyte enhancer factor 2C (transcription factor)                              |
| 129 | MKI67    | Marker of proliferation Ki-67                                                  |
| 130 | MS4A1    | Membrane spanning 4-domains A1 (encodes CD20)                                  |
| 131 | MT3      | Metallothionin-3                                                               |
| 132 | MYD88    | Myeloid differentiation primary response gene 88                               |
| 133 | NCAM1    | Neural cell adhesion molecule 1                                                |
| 134 | NELL1    | Neural epidermal growth factor-like 1 protein                                  |
| 135 | NF1      | Neurotrophic factor 1                                                          |
| 136 | NFATC1   | Nuclear factor of activated T cells 1                                          |
| 137 | NFATC2   | Nuclear factor of activated T cells 2                                          |
| 138 | NFATC2IP | Nuclear factor of activated T cells 2ip                                        |
| 139 | NGFB     | Nerve growth factor beta                                                       |
| 140 | NGFR     | Nerve growth factor receptor                                                   |
| 141 | NGFRAP1  | Nerve growth factor receptor associated protein 1                              |
| 142 | NR1/2    | NMDA receptor 1/2                                                              |
| 143 | NRG1     | Neuregulin 1                                                                   |
| 144 | NRG2     | Neuregulin 2                                                                   |
| 145 | NTF3     | Neurotrophic factor 3                                                          |
| 146 | NTF5     | Neurotrophic factor 5                                                          |
| 147 | NTRK1    | NTRK1 = tyrosine kinase receptor A                                             |
| 148 | NTRK2    | NTRK2 = tyrosine kinase receptor 2                                             |
| 149 | PAX5     | PAX5 (transcription factor)                                                    |
| 150 | PCGF2    | Polycomb group factor 2                                                        |
| 151 | PRF1     | Perforin 1                                                                     |
| 152 | PSPN     | Persephin                                                                      |
| 153 | PTGER2   | Prostaglandin E receptor 2                                                     |
| 154 | PTPRC    | Protein tyrosine phosphatase receptor type C                                   |
| 155 | SDC1     | Syndecan 1                                                                     |
| 156 | SLC3A2   | SLC3A2 = heavy-chain subunit CD98 of the cysteine/glutamate transporter system |
| 157 | SMAD7    | Smad 7                                                                         |
| 158 | SOCS1    | Suppressor of cytokine signaling 1                                             |
| 159 | SOCS5    | Suppressor of cytokine signaling 5                                             |
| 160 | STAT1    | Signal transducer and activator of transcription 1                             |
| 161 | STAT3    | Signal transducer and activator of transcription 3                             |
| 162 | STAT4    | Signal transducer and activator of transcription 4                             |
| 163 | STAT6    | Signal transducer and activator of transcription 6                             |
| 164 | TBX21    | T-box transcription factor 21                                                  |
| 165 | TFG      | TRK-fused gene                                                                 |
| 166 | TGFA     | Transforming growth factor alpha                                               |
| 167 | TGFB1    | Transforming growth factor beta 1                                              |
| 168 | TGFB2    | Transforming growth factor beta 2                                              |
| 169 | TGFBR1   | Transforming growth factor beta receptor 1                                     |
| 170 | TGFBR2   | Transforming growth factor beta receptor 2                                     |
| 171 | TLR1     | Toll-like receptor 1                                                           |
| 172 | TLR2     | Toll-like receptor 2                                                           |
| 173 | TLR3     | Toll-like receptor 3                                                           |
| 174 | TLR4     | Toll-like receptor 4                                                           |
| 175 | TLR5     | Toll-like receptor 5                                                           |
| 176 | TLR6     | Toll-like receptor 6                                                           |
| 177 | TLR7     | Toll-like receptor 7                                                           |
| 178 | TLR8     | Toll-like receptor 8                                                           |
| 179 | TLR9     | Toll-like receptor 9                                                           |
| 180 | TLR10    | Toll-like receptor 10                                                          |
| 181 | TMED1    | Transmembrane emb24 domain 1                                                   |
| 182 | TNF      | Tumor necrosis factor                                                          |

|     |           |                                      |
|-----|-----------|--------------------------------------|
| 183 | TNFRSF7   | Tumor necrosis factor receptor SF7   |
| 184 | TNFRSF8   | Tumor necrosis factor receptor SF8   |
| 185 | TNFRSF13C | Tumor necrosis factor receptor SF13C |
| 186 | TRO       | Trophinin                            |
| 187 | VEGF      | Vascular growth factor               |
| 188 | XCR1      | Chemokine receptor XCR1              |

---
